# Supplementary material for: Cost-effective fabrication of high-performance flexible all-solid-state carbon micro-supercapacitors by blue-violet laser direct writing and further surface treatment
Source: Royal Society of Chemistry journal article supplement (doi:10.1039/c5ta09450j), 2016-01-01
Supplement: c5ta09450j1.pdf [file c5ta09450j1.pdf]

## Supporting Information

### **Cost-effective fabrication of high-performance flexible all-solid-state carbon micro-supercapacitors by blue-violet laser direct writing and further surface treatment**

Jinguang Cai,<sup>ab</sup> Chao Lv<sup>ab</sup> and Akira Watanabe<sup>\*a</sup>

<sup>a</sup> Institute of Multidisciplinary Research for Advanced Materials, Tohoku University,  
2-1-1 Katahira, Aoba-ku, Sendai 980-8577, Japan

E-mail: watanabe@tagen.tohoku.ac.jp

<sup>b</sup> China Academy of Engineering Physics, P.O. Box 919-71, Mianyang 621900,  
Sichuan, P. R. China

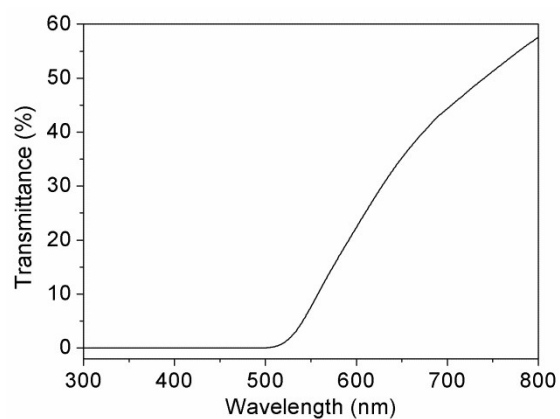

Fig. S1. UV-vis transmission spectrum of PI sheet with a thickness of 125  $\mu\text{m}$ .

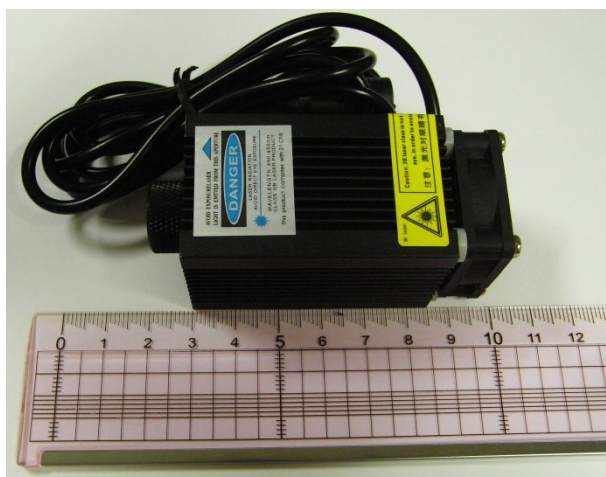

Fig. S2. Digital photograph of the adopted 405 nm CW semiconductor laser with high power and small volume.

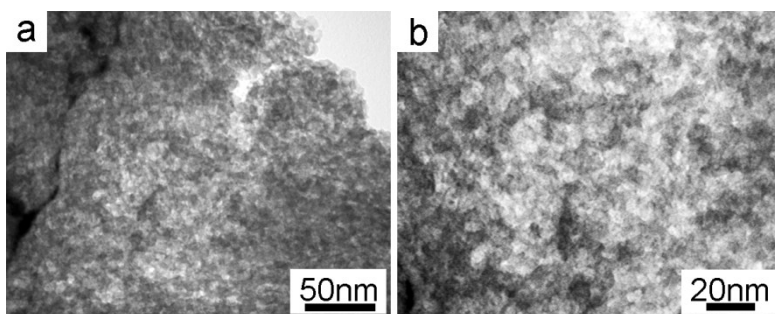

Fig. S3. TEM images of carbon structures obtained by laser writing on PI at laser power of 157 mW.

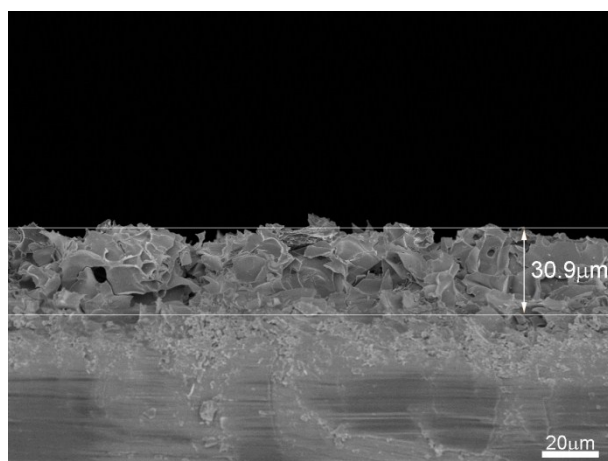

Fig. S4. Cross-section SEM image of carbon structures obtained by laser direct writing at laser power of 157 mW.

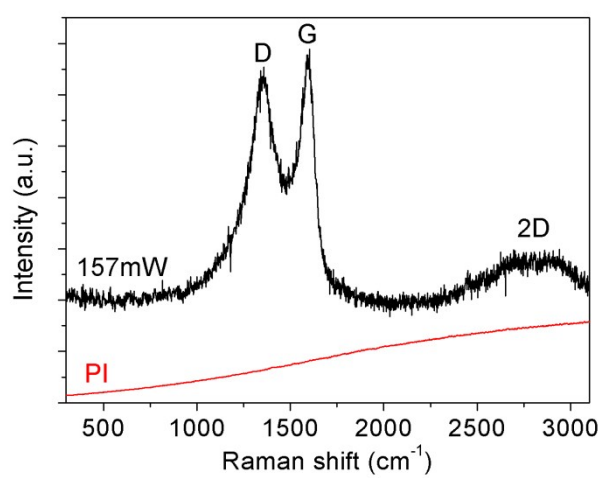

Fig. S5. Raman spectra of LISs at 157 mW and original PI film.

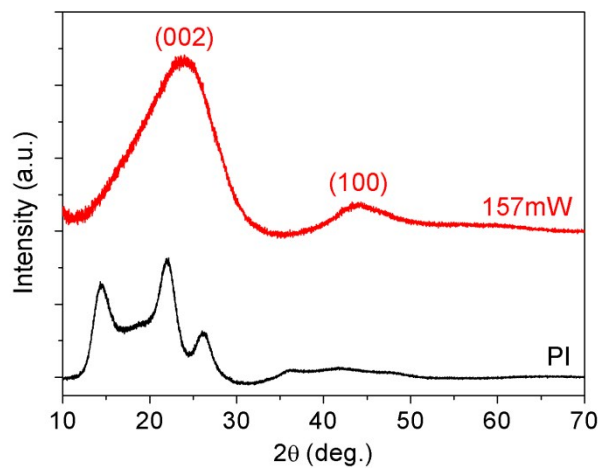

Fig. S6. XRD patterns of powdered LISs scraped from PI sheet and original PI sheet.

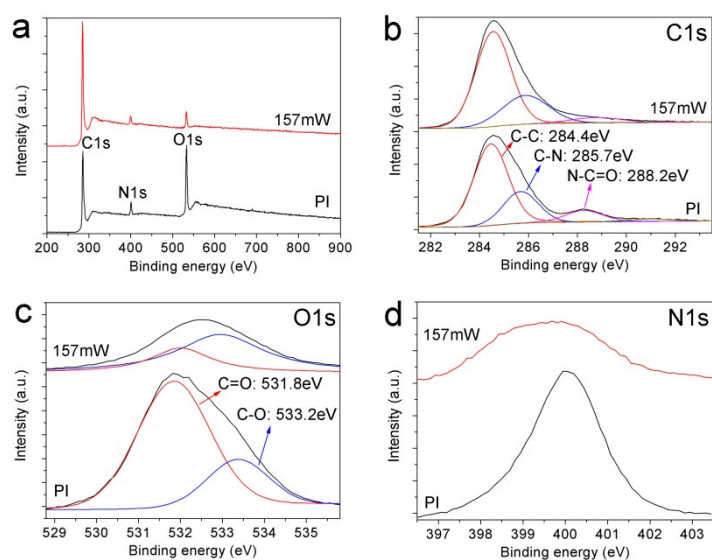

Fig. S7. XPS spectra (a), C1s XPS spectra (b), O1s XPS spectra (c), and N1s (d) of LISs film and original PI sheet.

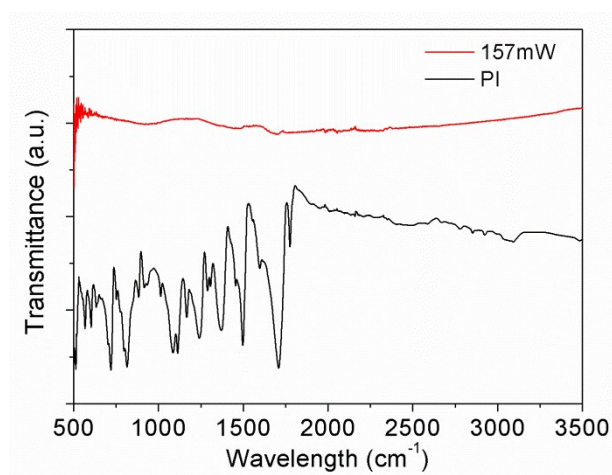

Fig. S8. FT-IR spectra of LISs film and original PI sheet.

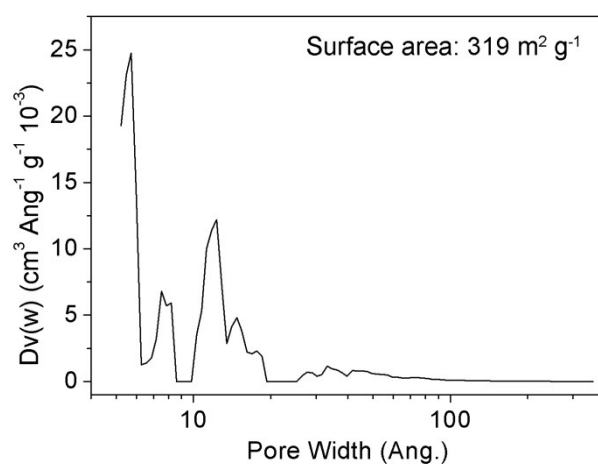

Fig. S9. Pore size distribution of laser induced carbon structures at laser power of 157 mW, which was obtained by density functional theory calculation (Software: Autosorb ver. 1.51, Quantachrome; Model:  $\text{N}_2$  at 77K on carbon, slit pore).

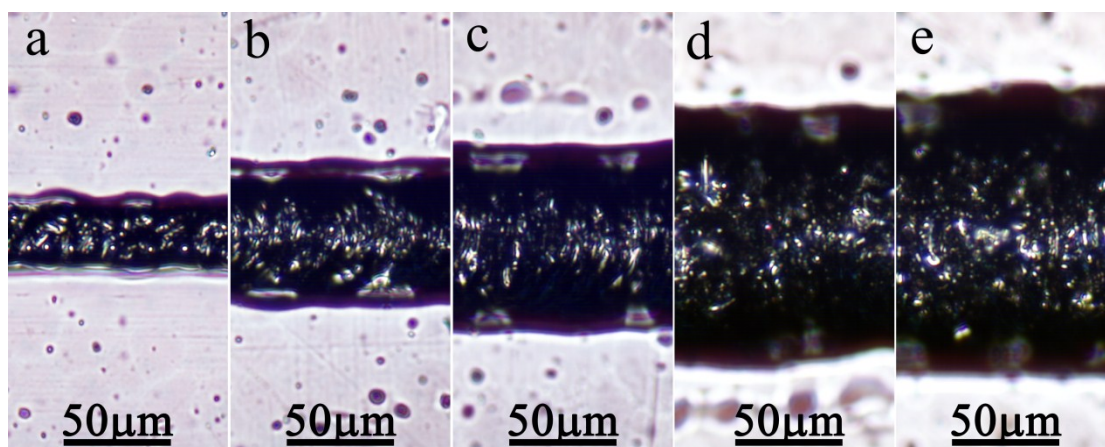

Fig. S10. Optical microscopy images of single lines carbonized by laser direct writing at different laser power. (a) 64 mW, (b) 82 mW, (c) 111 mW, (d) 157 mW, and (e) 218 mW.

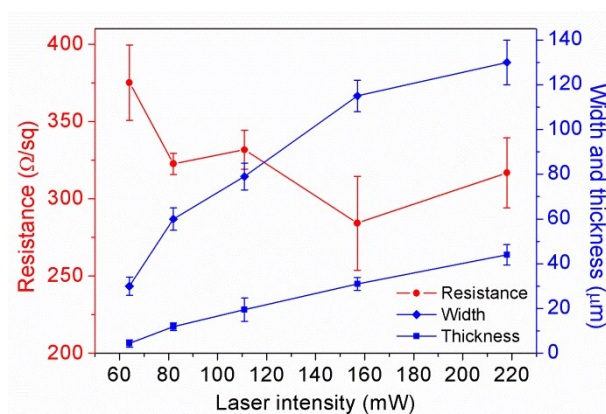

Fig. S11. The resistance and thickness of carbon films and width of single lines obtained at different laser power.

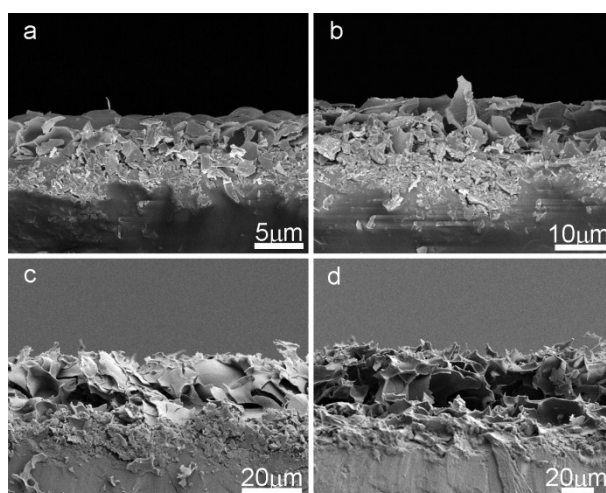

Fig. S12. Cross-section SEM images of carbon structures obtained by laser direct writing at different laser power: (a) 64 mW, (b) 82 mW, (c) 111 mW, and (d) 218 mW.

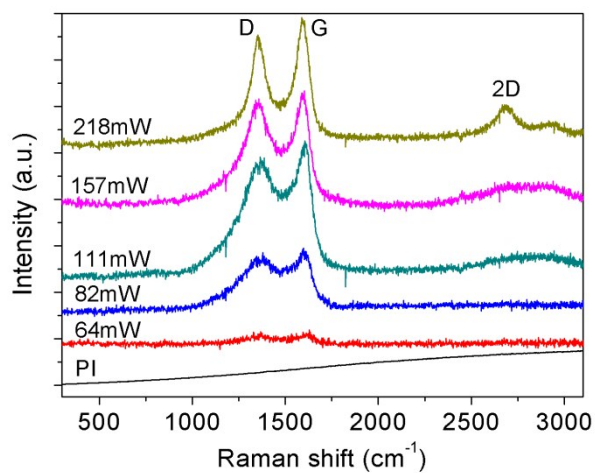

Fig. S13. Raman spectra of original PI film and LISs obtained at different laser power.

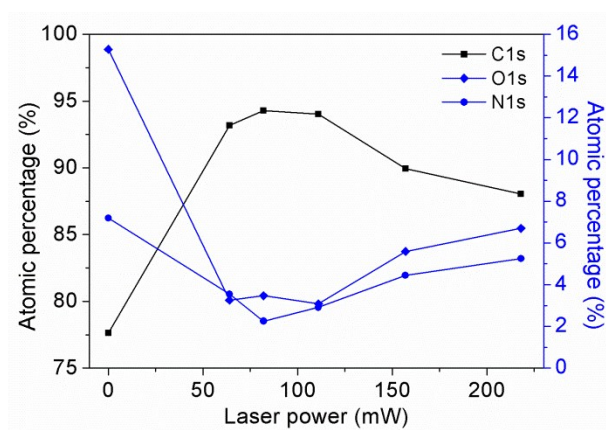

Fig. S14. Atomic percentages of carbon, oxygen and nitrogen obtained from XPS data of the structures prepared at different laser power.

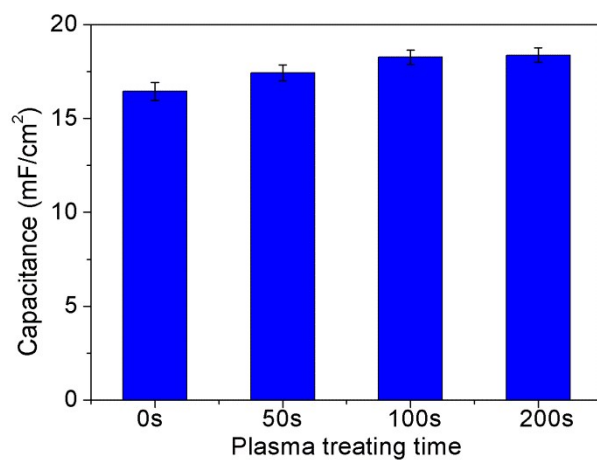

Fig. S15. Specific capacitances calculated from CV curves of MSCs obtained at laser power of 157 mW after plasma treating for different time. Scan rate is 10 mV/s.



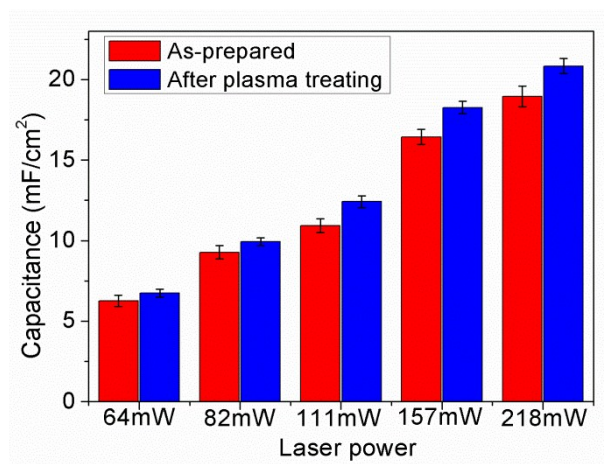

Fig. S16. Specific capacitances of MSCs before and after plasma treating calculated from CV curves as a function of laser power at a scan rate of 10 mV/s.



Table S1. Comparison of specific capacitance (mF/cm<sup>2</sup>) of MSCs based on carbon materials

| Preparation method <sup>a</sup> | Materials <sup>b</sup> | Electrolyte <sup>c</sup>               | Specific capacitance (mF/cm <sup>2</sup> ) <sup>d</sup>     | Ref. <sup>e</sup> |
|---------------------------------|------------------------|----------------------------------------|-------------------------------------------------------------|-------------------|
| <b>LC</b>                       | <b>Carbon</b>          | <b>PVA/H<sub>2</sub>SO<sub>4</sub></b> | <b>18.3 @ 10 mV/s</b><br><b>35 @ 0.05 mA/cm<sup>2</sup></b> | <b>This work</b>  |
| Screen printing                 | N-doped RGO            | PVA/H <sub>3</sub> PO <sub>4</sub>     | 3.4 @ 20 $\mu$ A/cm <sup>2</sup>                            | 19                |
| LC                              | Carbon                 | PVA/H <sub>3</sub> PO <sub>4</sub>     | 0.8 @ 10 mV/s                                               | 40                |
| LIG                             | Graphene               | PVA/H <sub>2</sub> SO <sub>4</sub>     | 9 @ 20 $\mu$ A/cm <sup>2</sup>                              | 37                |
| Photolithography                | Carbon onion           | Et <sub>4</sub> NBF <sub>4</sub> /PC   | 1.7 @ 1 V/s                                                 | 17                |
| Photolithography                | Activated carbon       | Et <sub>4</sub> NBF <sub>4</sub> /PC   | 11.6 @ 0.5 V/s                                              | 17                |
| LIG                             | B-doped graphene       | PVA/H <sub>2</sub> SO <sub>4</sub>     | 16.5 @ 50 $\mu$ A/cm <sup>2</sup>                           | 39                |
| LIG                             | Graphene               | H <sub>2</sub> SO <sub>4</sub>         | 4 @ 20 mV/s                                                 | 38                |
|                                 |                        |                                        | 3.9@0.2 mA/cm <sup>2</sup>                                  |                   |
| Photolithography                | MWCNT                  | Ionogel                                | ~0.265 @ 10 mV/s*                                           | 18                |
| Photolithography                | RGO                    | PVA/H <sub>2</sub> SO <sub>4</sub>     | 0.87 mF/cm <sup>2</sup> @ 1 V/s                             | 21                |
| Photolithography                | Graphene/MWCNTs        | PVA/H <sub>3</sub> PO <sub>4</sub>     | 2.54 @ 10 mV/s                                              | 14                |
| Laser scribing                  | LSG/MWCNTs             | PVA/H <sub>3</sub> PO <sub>4</sub>     | ~0.5 @ 0.16 mA/cm <sup>2</sup> *                            | 36                |
| Photolithography                | MWCNTs                 | PVA/H <sub>3</sub> PO <sub>4</sub>     | 2.75 @ 10 mV/s*                                             | 23                |
| Photolithography                | Graphene/CNTs          | Na <sub>2</sub> SO <sub>4</sub>        | 2.16                                                        | 46                |
| Laser scribing                  | RGO                    | PVA/H <sub>2</sub> SO <sub>4</sub>     | 2.32 @ 13 $\mu$ A/cm <sup>2</sup>                           | 35                |
| Laser reduction                 | RGO                    | Hydrated GO                            | 0.51 @ 20 mV/s                                              | 27                |
| LBL assembly                    | RGO                    | PVA/H <sub>3</sub> PO <sub>4</sub>     | ~0.4                                                        | 45                |
| Photolithography                | Activated carbon       | Et <sub>4</sub> NBF <sub>4</sub> /PC   | 2.1                                                         | 44                |
| Photolithography                | CDC                    | Et <sub>4</sub> NBF <sub>4</sub> /PC   | 1.5 @ 100 mV/s                                              | 43                |
| Photolithography                | RGO/CNT                | 3 M KCl                                | 6.1 @ 10 mV/s                                               | 42                |
| Photolithography                | GQDs                   | 0.5M Na <sub>2</sub> SO <sub>4</sub>   | 0.534 @ 15 $\mu$ A/cm <sup>2</sup>                          | 41                |
| Lithography                     | Graphene               | PVA/H <sub>2</sub> SO <sub>4</sub>     | 0.0807 @10 mV/s                                             | 47                |
| Lithography                     | MWCNT                  | PVA/H <sub>2</sub> SO <sub>4</sub>     | 0.562@1V/s                                                  | 48                |
| Photolithography                | RGO                    | PVA/H <sub>3</sub> PO <sub>4</sub>     | 0.54@0.5V/s                                                 | 49                |
| Lithography                     | SWCNT                  | H <sub>2</sub> SO <sub>4</sub>         | 0.364*                                                      | 50                |
| Photolithography                | Porous carbon          | H <sub>2</sub> SO <sub>4</sub>         | 0.75@100mV/s                                                | 51                |
| Photolithography                | Graphene               | PVA/H <sub>2</sub> SO <sub>4</sub>     | 0.116@10mV/s                                                | 52                |
| Photolithography                | MWCNT                  | Ionogel                                | ~0.33@1V/s*                                                 | 53                |
| Photolithography                | RGO                    | PVA/H <sub>3</sub> PO <sub>4</sub>     | 0.462                                                       | 54                |
| Photolithography                | RGO                    | PVA/KOH                                | 0.897@10mV/s                                                | 55                |
| Lithography                     | BNG                    | PVA/H <sub>2</sub> SO <sub>4</sub>     | 0.39@10mV/s*                                                | 56                |
| Lithography                     | Activated graphene     | PVA/H <sub>2</sub> SO <sub>4</sub>     | 89.5@10mV/s                                                 | 57                |
| Photolithography                | nc-PDDA-Gr             | PVA/H <sub>2</sub> SO <sub>4</sub>     | 409                                                         | 58                |

<sup>a</sup> Laser carbonization (LC) and laser induced graphene (LIG). <sup>b</sup> Reduced graphene oxide (RGO), multiwalled carbon nanotubes (MWCNTs), carbon nanotubes (CNTs), laser scribed graphene (LSG), carbide derived carbon (CDC), graphene quantum dots (GQDs), single-walled carbon nanotubes (SWCNTs), nitrogen and boron co-doped graphene (BNG) and nanochanneled and poly(diallyldimethylammonium chloride) PDDA-mediated RGO (nc-PDDA-Gr). <sup>c</sup>

tetraethylammonium tetrafluoroborate in anhydrous propylene carbonate ( $\text{Et}_4\text{NBF}_4/\text{PC}$ ) and poly(ethylene glycol) diacrylate with 1-ethyl-3-methylimidazolium bis(trifluoromethylsulfonyl) imide (Ionogel electrolyte). <sup>d</sup> Please note that the data is based on the information found in the references and some of the values are calculated from the reported data. <sup>e</sup> References are listed in the main text. \* The values were calculated from the corresponding references.
